# Supplementary material for: Electrostatically self-assembled two-dimensional magnetized MXene/hollow Fe3O4 nanoparticle hybrids with high electromagnetic absorption performance and improved impendence matching
Source: Royal Society of Chemistry journal article supplement (doi:10.1039/d0ta10551a), 2020-12-16
Supplement: d0ta10551a1.pdf [file d0ta10551a1.pdf]

## Supplementary Material

### Electrostatic self-assembled two-dimensional magnetized MXene/hollow $\text{Fe}_3\text{O}_4$ nanoparticle hybrids with high electromagnetic absorption performance and improved impedance matching

Baiwen Deng, Zhicheng Liu, Fei Pan, Zhen Xiang, Xian Zhang, Wei Lu\*

Shanghai Key Lab. of D&A for Metal-Functional Materials, School of Materials Science & Engineering,  
Tongji University, Shanghai 201804, China.

\*Corresponding authors. E-mail address: weilu@tongji.edu.cn (Wei Lu)

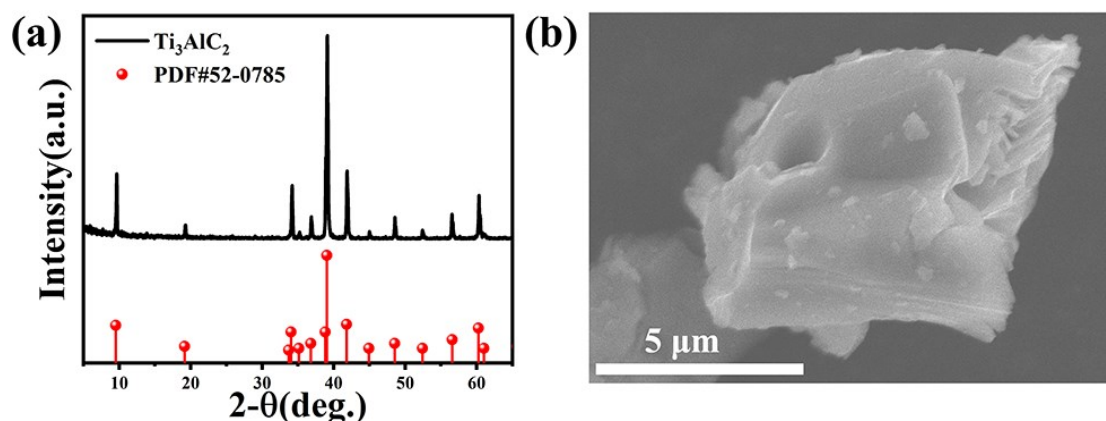

Fig.S1 (a)XRD pattern and (b) SEM image of of  $\text{Ti}_3\text{AlC}_2$

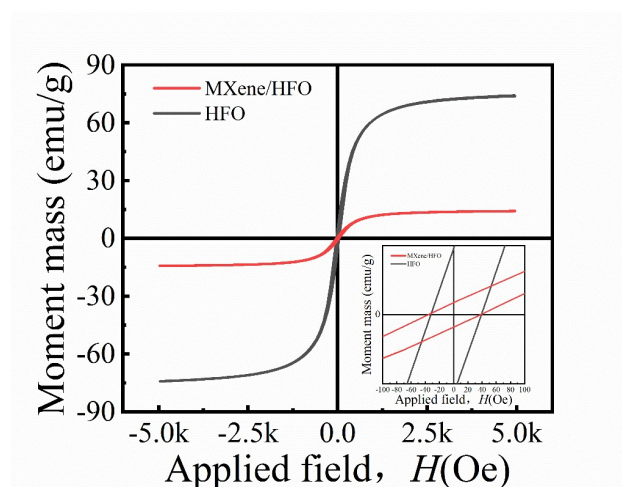

Fig.S2 The magnetic hysteresis loops of HFO and MXene/HFO hybrids

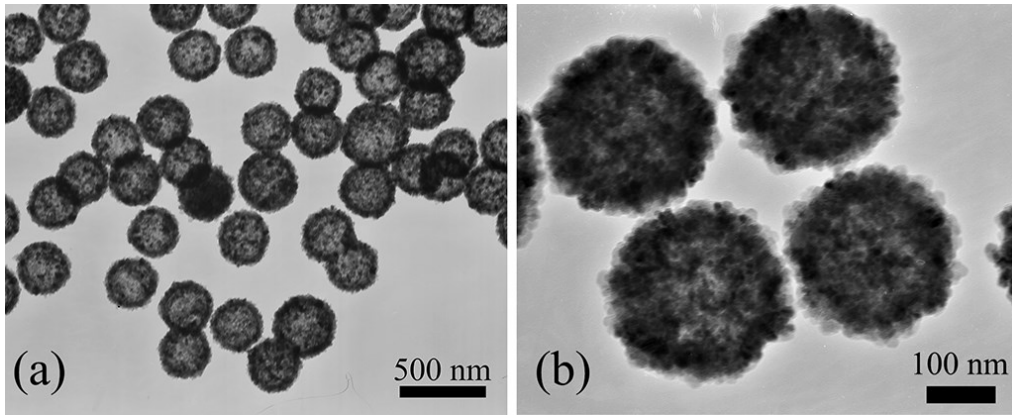

Fig.S3 TEM images for HFO.

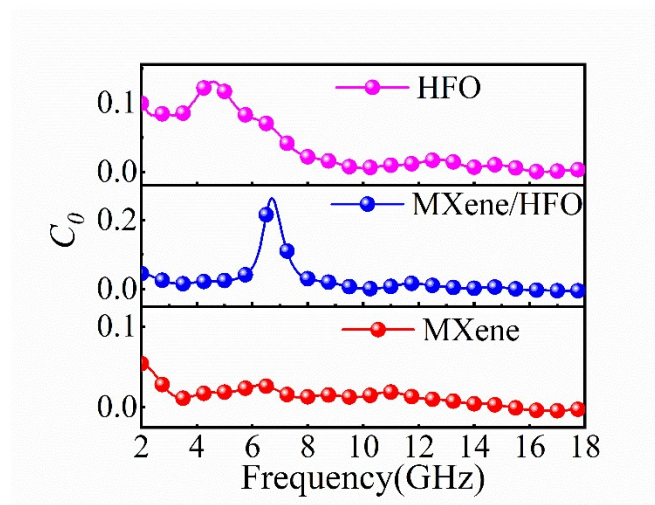

Fig.S4 The  $C_0$  curves of HFO, MXene/HFO hybrids and MXene.

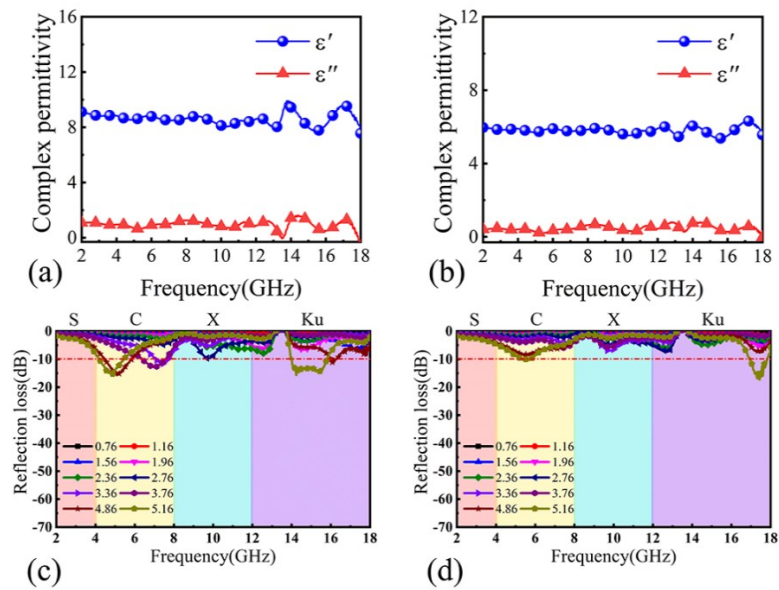

Fig.S5 The  $\epsilon'$  and  $\epsilon''$  curves and RL curves for MXene/HFO hybrids with 50 wt% ((a),

(c)) and 75 wt% ((b), (d)) content of HFO.

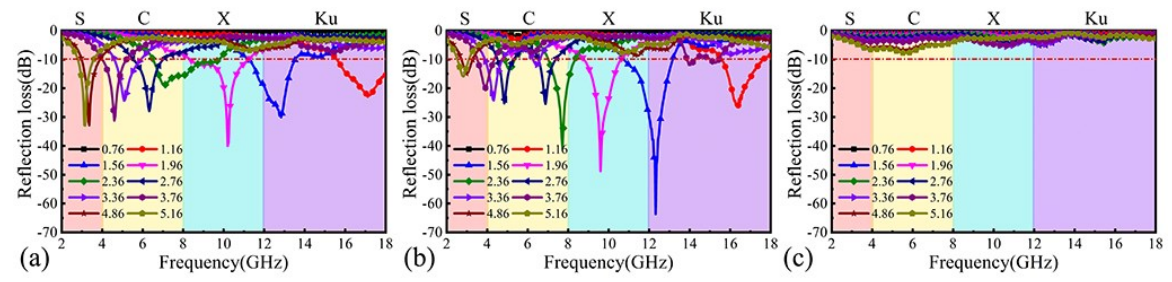

Fig.S6 The RL curves with various thicknesses for MXene (a), MXene/HFO hybrids (b) and HFO(c).
